# Supplementary material
Source: PubMed Central journal article supplement (PMC4277676)
Supplement: supp_WNL.0000000000001069_e-figures.pdf [file supp_WNL.0000000000001069_e-figures.pdf]

***Vigabatrin retinal toxicity in children with Infantile Spasms: an observational cohort study.***

C. A. Westall PhD<sup>1,2</sup>, T. Wright PhD<sup>1</sup>, F. Cortese<sup>3</sup> PhD, A. Kumarappah<sup>1</sup> MSc, O.C. Snead III, MD, FAAN<sup>4</sup>, J. R. Buncic<sup>1,2</sup>, MD, FRCSP.

**Supplemental Data**

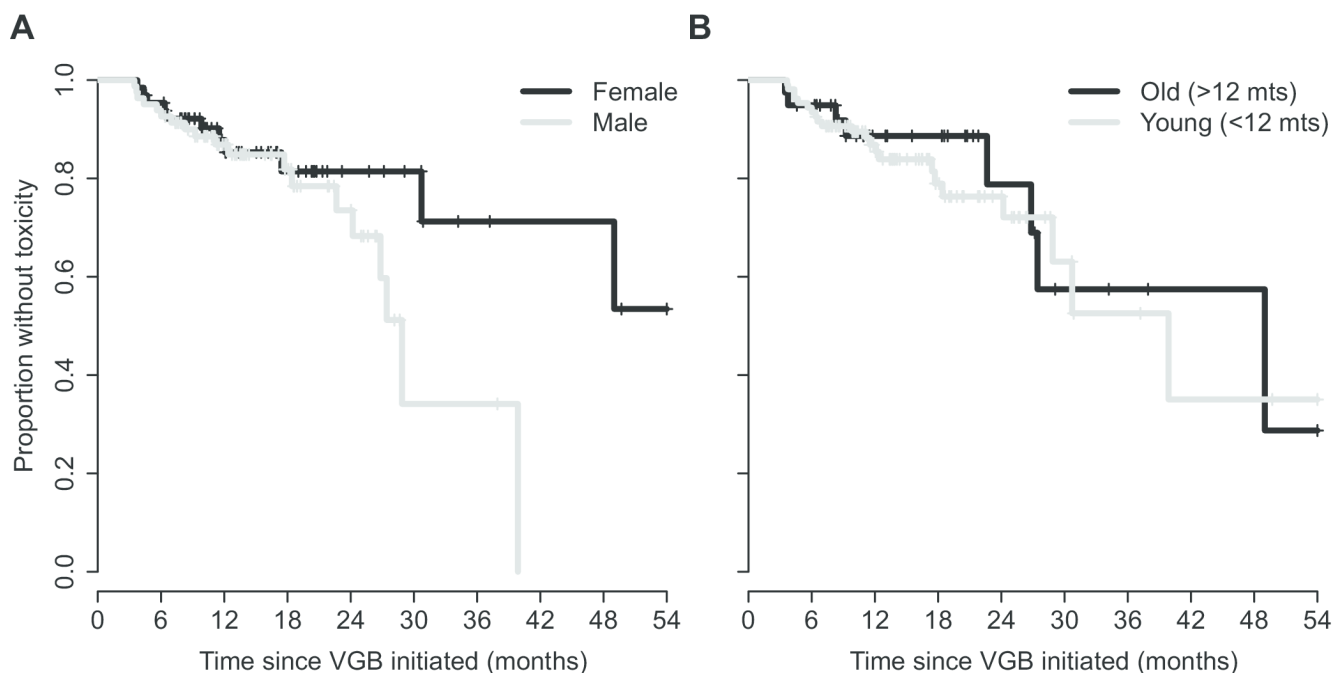

**Figure e-1. Survival curves showing the proportion of children without VGB-RD according to sex of the child and duration of drug treatment.**

*(A) The Kaplan-Meier survival function for girls is depicted by the solid line and that for boys is the grey line.*

*(B) The solid line represents the Kaplan-Meier survival function for children who started VGB treatment over the age of 12 months. The grey line represents Kaplan-Meier survival function for children who were younger than 12 months when starting VGB.*

*mts = months. The small vertical tick-marks represent withdrawal from the study resulting in censoring of this participant from the sample.*

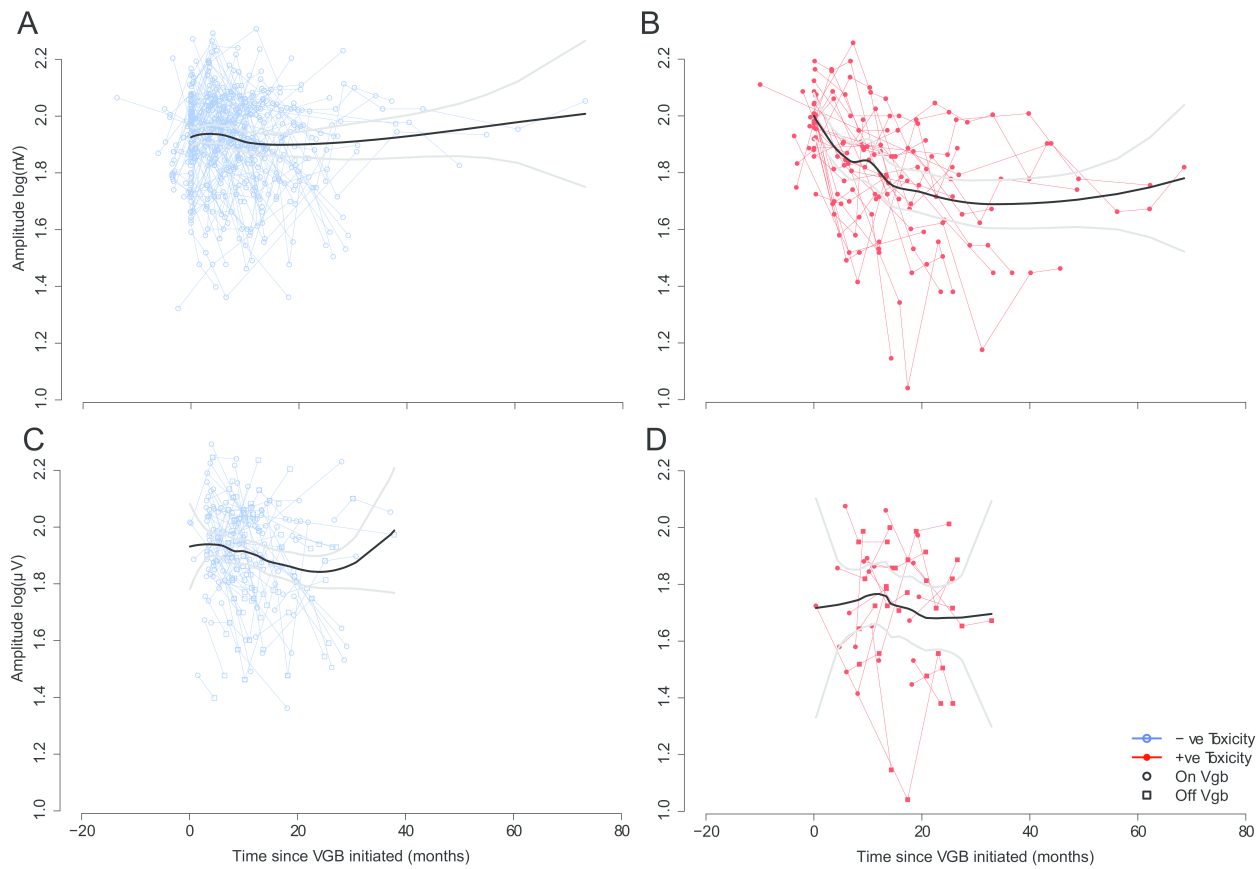

**Figure e-2. Individual data points of LA 2.29 flicker amplitude, during and after VGB treatment grouped according to VGB-RD status.**

- (A) Individuals without VGB-RD during VGB treatment,*
- (B) Individuals with VGB-RD during VGB treatment,*
- (C) Individuals without VGB-RD following drug treatment.*
- (D) Individuals with VGB-RD following drug treatment.*
